# Supplementary material for: Ice core chemistry database: an Antarctic compilation of sodium and sulfate records spanning the past 2000 years
Source: Copernicus journal article supplement (doi:10.5194/essd-15-2517-2023), 2023-06-20
Supplement: Supplementary file 1 [file essd-15-2517-2023-supplement.pdf]

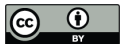

*Supplement of*

## **Ice core chemistry database: an Antarctic compilation of sodium and sulfate records spanning the past 2000 years**

**Elizabeth R. Thomas et al.**

*Correspondence to:* Elizabeth R. Thomas (lith@bas.ac.uk)

The copyright of individual parts of the supplement might differ from the article licence.

**Table S1** CLIVASH2k chemistry data site metadata and reference. Analytical duplicates indicated in italics.

| Name                 | Latitude (°S) | Longitude (E/-W) | Elevation (m) | Start year (CE) | End year (CE) | Reference                                                                                   |
|----------------------|---------------|------------------|---------------|-----------------|---------------|---------------------------------------------------------------------------------------------|
| 105km                | -67.43        | 93.38            | 1416          | 1774            | 1981          | This study                                                                                  |
| ABN_13/14_snowpit    | -71.17        | 110.37           | 2964          | 2004            | 2013          | (Winton et al., 2022; Winton and Edwards, 2022)                                             |
| B40                  | -75.00        | 0.06             | 2892          | 0               | 2012          | (Sigl et al., 2014; Sigl et al., 2015); This study                                          |
| BER11C95_25          | -79.61        | -45.72           | 886           | 957             | 1992          | (Ruth et al., 2004)                                                                         |
| <i>BH-2</i>          | -78.47        | 106.80           | 3488          | 0               | 1541          | This study                                                                                  |
| <i>BH-1</i>          | -78.47        | 106.80           | 3488          | 1520            | 1541          | This study                                                                                  |
| Bouvet Island        | -54.42        | 3.39             | 350           | 2001            | 2016          | (King et al., 2019; Thomas et al., 2021)                                                    |
| Bruce Plateau        | -66.03        | -64.07           | 1975          | 1400            | 2009          | This study                                                                                  |
| cDML                 | -71.33        | 11.58            | 1300          | 1904            | 2006          | (Rahaman et al., 2016; Naik et al., 2010)                                                   |
| CWA_a_2013           | -82.37        | -119.29          | 950           | 1939            | 1993          | (Reusch et al., 1999)                                                                       |
| CWA_d_2013           | -81.37        | -107.28          | 1930          | 1952            | 1993          | (Reusch et al., 1999)                                                                       |
| DF01                 | -77.37        | 39.70            | 3810          | 607             | 1904          | (Motizuki et al., 2017; Motizuki et al., 2014)                                              |
| DFS10                | -77.40        | 39.62            | 3800          | 0               | 2010          | (Sigl et al., 2014); This study                                                             |
| DIR                  | -70.23        | 26.33            | 450           | 1752            | 2011          | (Philippe et al., 2016)                                                                     |
| DIV2010              | -77.95        | -95.96           | 1329          | 1785            | 2010          | (Pasteris et al., 2014; Sigl et al., 2014)                                                  |
| DML03C98_09 (FB9809) | -74.50        | 1.96             | 2843          | 1731            | 1996          | (Sommer et al., 2000)                                                                       |
| DML05                | -75.00        | 0.02             | 2892          | 150             | 1998          | (Traufetter et al., 2004)                                                                   |
| DML07                | -75.58        | 3.43             | 2680          | 454             | 1996          | (Traufetter et al., 2004)                                                                   |
| DML15C98_14 (FB9814) | -75.08        | 2.50             | 2970          | 1766            | 1996          | (Sommer et al., 2000)                                                                       |
| DML17C98_33 (B33)    | -75.17        | 6.50             | 3160          | 0               | 1996          | (Sommer et al., 2000)                                                                       |
| DSS0506              | -66.77        | 112.81           | 1370          | 1927            | 1989          | (Vallelonga et al., 2016)                                                                   |
| DT401                | -79.02        | 77.00            | 3760          | 0               | 1998          | (Ren et al., 2010a; Li et al., 2015; Li et al., 2012; Yang et al., 2019; Ren et al., 2010b) |
| <i>EDC</i>           | -75.10        | 123.35           | 3233          | N/A             | N/A           | (Wolff et al., 2006; Wolff et al., 2010)                                                    |

|                    |        |         |      |      |      |                                                                 |
|--------------------|--------|---------|------|------|------|-----------------------------------------------------------------|
| <i>EDC_50y</i>     | -75.10 | 123.35  | 3233 | N/A  | N/A  | (Röthlisberger et al., 2002)                                    |
| <i>EPICA DC</i>    | -75.10 | 123.35  | 3233 | N/A  | N/A  | (Fischer et al., 2007)                                          |
| <i>EPICA DomeC</i> | -75.10 | 123.35  | 3233 | N/A  | N/A  | (Castellano et al., 2005; Fujita et al., 2015)                  |
| <i>EDC96</i>       | -75.10 | 123.35  | 3232 | 1    | 1907 | (Castellano et al., 2005; Sigl et al., 2014)                    |
| EDML               | -75.00 | 0.07    | 2892 | N/A  | N/A  | (Fischer et al., 2007)                                          |
| Ferrigno           | -74.57 | -86.90  | 1354 | 1703 | 2010 | (Thomas et al., 2015; Thomas et al., 2013)                      |
| FIS_BI             | -70.40 | -3.03   | 394  | 1996 | 2012 | (Vega et al., 2018)                                             |
| FIS_KC             | -70.52 | 2.95    | 264  | 1958 | 2007 | (Vega et al., 2018)                                             |
| FIS_KM             | -70.13 | 1.20    | 268  | 1995 | 2012 | (Vega et al., 2018)                                             |
| FIS_S100           | -70.23 | 4.80    | 48   | 1737 | 1999 | (Vega et al., 2018)                                             |
| <i>GIP (ICPMS)</i> | -79.97 | 160.20  | 380  | 2000 | 2007 | This study                                                      |
| <i>GIP (IC)</i>    | -79.97 | 160.20  | 380  | 2000 | 2007 | (Markle et al., 2012); This study                               |
| Gomez              | -73.59 | -70.36  | 1400 | 1854 | 2006 | (Thomas et al., 2008; Thomas and Bracegirdle, 2009)             |
| H15                | -69.08 | 40.78   | 1050 | 1992 | 1632 | (Kohno and Fujii, 2002; Kohno et al., 1999; Kohno et al., 1995) |
| IC-06              | -81.05 | -79.84  | 750  | 1935 | 2002 | (Schwanck et al., 2017)                                         |
| <i>ISO-ICE_spa</i> | -75.00 | 0.08    | 2892 | 2009 | 2016 | (Winton et al., 2020)                                           |
| <i>ISO-ICE_spb</i> | -75.00 | 0.08    | 2892 | 2008 | 2016 | (Winton et al., 2020)                                           |
| ITASE-00-1         | -79.38 | -111.24 | 1791 | 1653 | 2000 | (Mayewski and Dixon., 2005)                                     |
| ITASE-00-2         | -78.73 | -111.50 | 1675 | 1987 | 2000 | (Mayewski and Dixon., 2005)                                     |
| ITASE-00-3         | -78.43 | -115.92 | 1742 | 1888 | 2000 | (Mayewski and Dixon., 2005)                                     |
| ITASE-00-4         | -78.08 | -120.08 | 1697 | 1798 | 2000 | (Mayewski and Dixon., 2005)                                     |
| ITASE-00-5         | -77.68 | -124.00 | 1828 | 1715 | 2000 | (Mayewski and Dixon., 2005)                                     |
| ITASE-01-1         | -79.16 | -104.97 | 1842 | 1857 | 2001 | (Mayewski and Dixon., 2005)                                     |
| ITASE-01-2         | -77.84 | -102.91 | 1336 | 1889 | 2001 | (Mayewski and Dixon., 2005)                                     |
| ITASE-01-3         | -78.12 | -95.65  | 1620 | 1858 | 2001 | (Mayewski and Dixon., 2005)                                     |
| ITASE-01-4         | -77.61 | -92.25  | 1483 | 1863 | 2001 | (Mayewski and Dixon., 2005)                                     |
| ITASE-01-5         | -77.06 | -89.14  | 1239 | 1779 | 2001 | (Mayewski and Dixon., 2005)                                     |

|                        |        |         |      |      |      |                                                                          |
|------------------------|--------|---------|------|------|------|--------------------------------------------------------------------------|
| ITASE-01-6             | -76.10 | -89.02  | 1228 | 1977 | 2000 | (Mayewski and Dixon., 2005)                                              |
| ITASE-02-1             | -82.00 | -110.01 | 1746 | 1783 | 2002 | (Mayewski and Dixon., 2005)                                              |
| ITASE-02-4             | -86.50 | -107.99 | 2586 | 1593 | 2002 | (Mayewski and Dixon., 2005)                                              |
| ITASE-02-5             | -88.00 | -107.98 | 2745 | 1967 | 2002 | (Mayewski and Dixon., 2005)                                              |
| ITASE-02-6             | -89.93 | 144.39  | 2808 | 1911 | 1996 | (Dixon et al., 2012)                                                     |
| ITASE-02-7             | -89.00 | 59.97   | 3000 | 1900 | 2002 | (Mayewski and Dixon., 2005)                                              |
| ITASE-03-1             | -86.84 | 95.31   | 3124 | 1768 | 2003 | (Mayewski and Dixon., 2005)                                              |
| ITASE-03-3             | -82.08 | 101.96  | 3444 | 1737 | 1965 | (Mayewski and Dixon., 2005)                                              |
| ITASE-99-1             | -80.62 | -122.63 | 1350 | 1723 | 1999 | (Mayewski and Dixon., 2005)                                              |
| Jurassic               | -74.30 | -73.05  | 1139 | 1874 | 2011 | (Thomas and Bracegirdle, 2015; Emanuelsson et al., 2022)                 |
| LawDome_DSS            | -66.77 | 112.81  | 1370 | 0    | 2016 | (Jong et al., 2022)                                                      |
| LGB69                  | -70.83 | 77.07   | 1850 | 1708 | 2001 | (Yang et al., 2019; Li et al., 2015; Li et al., 2012; Ren et al., 2010b) |
| <i>MES2012 (IC)</i>    | -77.52 | 167.68  | 1600 | 1794 | 2006 | (Rhodes et al., 2012)                                                    |
| <i>MES2012 (ICPMS)</i> | -77.52 | 167.68  | 1600 | 1473 | 2006 | (Rhodes et al., 2012)                                                    |
| MI0910                 | -65.55 | 100.79  | 500  | 1913 | 2009 | (Inoue et al., 2017)                                                     |
| Mount Johns            | -79.92 | -94.39  | 2100 | 1883 | 2008 | (Thoen., 2018; Schwanck et al., 2017)                                    |
| NFL-1                  | -77.09 | 95.38   | 3760 | 1997 | 2007 | (Khodzher et al., 2020)                                                  |
| NUS07-1                | -73.72 | 7.98    | 3174 | 1754 | 2007 | (Pasteris et al., 2014); This study                                      |
| NUS07-2                | -76.07 | 22.47   | 3582 | 336  | 1993 | (Pasteris et al., 2014); This study                                      |
| NUS07-5                | -78.65 | 35.63   | 3619 | 0    | 1982 | (Pasteris et al., 2014); This study                                      |
| NUS07-7                | -82.07 | 54.88   | 3725 | 5    | 2007 | (Pasteris et al., 2014); This study                                      |
| NUS08-4                | -82.82 | 18.90   | 2552 | 1621 | 2008 | (Pasteris et al., 2014); This study                                      |
| NUS08-5                | -82.63 | 17.87   | 2554 | 346  | 2000 | (Pasteris et al., 2014); This study                                      |
| NUS08-7                | -74.88 | 1.60    | 2700 | 1258 | 2008 | (Pasteris et al., 2014); This study                                      |
| NVFL00                 | -76.70 | 102.17  | 3530 | 1977 | 2009 | (Khodzher et al., 2020)                                                  |
| NVFL-1                 | -77.09 | 95.38   | 3760 | 1774 | 2007 | (Khodzher et al., 2020)                                                  |
| Palmer                 | -73.86 | -65.46  | 1897 | 1621 | 2011 | (Emanuelsson et al., 2022)                                               |
| <i>PIG2010</i>         | -78.00 | -96.00  | 1593 | 1918 | 2009 | (Pasteris et al., 2014; Sigl et al., 2014)                               |

|                    |        |         |      |      |      |                                                  |
|--------------------|--------|---------|------|------|------|--------------------------------------------------|
| <i>PIG</i>         | -78.00 | -96.00  | 1593 | 1980 | 2009 | (Criscitiello et al., 2013)                      |
| PV-10              | -72.81 | 79.93   | 2800 | 1976 | 2009 | (Osipov et al., 2020)                            |
| Rendezvous         | -74.45 | -78.17  | 1006 | 1843 | 2011 | (Emanuelsson et al., 2022), This study           |
| RICE12-13pit       | -79.36 | -161.71 | 500  | 2011 | 2012 | (Winton et al., 2016)                            |
| RIDS95A_2013       | -78.73 | -116.33 | 1740 | 1831 | 1995 | (Kreutz et al., 2000)                            |
| RIDS95B_2013       | -79.46 | -118.05 | 1603 | 1922 | 1995 | (Kreutz et al., 2000)                            |
| RIDS95C_2013       | -80.01 | -119.43 | 1530 | 1903 | 1995 | (Kreutz et al., 2000)                            |
| SCH2               | -79.55 | -84.05  | 1059 | 1975 | 2014 | (Hoffmann et al., 2020)                          |
| SDM1994_2013       | -81.65 | -148.79 | 620  | 1891 | 1994 | (Kreutz et al., 1997)                            |
| SHIC               | -72.67 | -99.63  | 474  | 1999 | 2019 | (Tetzner et al., 2022)                           |
| SKBL               | -74.85 | -71.59  | 1419 | 1999 | 2019 | (Tetzner et al., 2022)                           |
| SouthPole1995_2013 | -90.00 | 0.00    | 2850 | 1430 | 1989 | (Meyerson et al., 2002)                          |
| SP01               | -89.95 | 17.67   | 2835 | 905  | 2000 | (Budner and Cole-Dai, 2004)                      |
| SP04C5             | -89.95 | 17.67   | 2835 | 176  | 2004 | (Ferris et al., 2011)                            |
| SP04C6             | -89.95 | 17.67   | 2835 | 1073 | 2004 | (Ferris et al., 2011)                            |
| SPICE              | -89.99 | -98.16  | 2835 | 0    | 2014 | (Winski et al., 2021)                            |
| SW-42              | -78.74 | 105.59  | 3590 | 1985 | 2012 | (Osipov et al., 2020)                            |
| SW-80              | -79.01 | 104.47  | 3590 | 1989 | 2014 | This study                                       |
| TA192A             | -66.78 | 139.56  | 602  | 1997 | 2015 | (Goursaud et al., 2019)                          |
| TD05               | -72.80 | 159.10  | 2316 | 542  | 1986 | (Severi et al., 2012; Severi et al., 2017)       |
| TD96               | -72.48 | 159.06  | 2316 | 1212 | 2009 | (Stenni et al., 2002; Sigl et al., 2014)         |
| TaylorDome         | -77.81 | 158.72  | 2365 | 1    | 1953 | (Mayewski et al., 1996; Baggenstos et al., 2018) |
| <i>THW2010</i>     | -77.00 | -121.20 | 2020 | 1867 | 2009 | (Sigl et al., 2014)                              |
| <i>THW</i>         | -77.00 | -121.20 | 2020 | 1980 | 2009 | (Criscitiello et al., 2013)                      |
| UpC_2013           | -82.44 | -135.97 | 525  | 1870 | 1995 | (Mayewski and Dixon., 2005)                      |
| VFL-1              | -78.09 | 102.80  | 3570 | 1806 | 1888 | (Khodzher et al., 2020)                          |
| VK07               | -78.45 | 106.84  | 3488 | 1634 | 1946 | This study                                       |
| VK55               | -78.45 | 106.84  | 3488 | 1976 | 2009 | (Osipov et al., 2020)                            |

|                         |        |         |      |      |      |                                                                    |
|-------------------------|--------|---------|------|------|------|--------------------------------------------------------------------|
| VKT55                   | -78.45 | 106.84  | 3488 | 1854 | 1972 | This study                                                         |
| VLG                     | -77.33 | 162.53  | 624  | 1300 | 2000 | (Bertler et al., 2004; Bertler et al., 2011; Bertler et al., 2005) |
| <i>Vostok5G (ICPMS)</i> | -78.47 | 106.80  | 3488 | 7    | 1620 | This study                                                         |
| <i>Vostok5G (IC)</i>    | -78.47 | 106.80  | 3488 | 0    | 1857 | This study                                                         |
| W10k                    | -66.75 | 112.83  | 1390 | 1735 | 2007 | (Sigl et al., 2014); This study                                    |
| WDC05Q                  | -79.46 | -112.23 | 1759 | 1521 | 2004 | (Sigl et al., 2013); This study                                    |
| WDC05A                  | -79.46 | -112.23 | 1759 | 1774 | 2005 | (Banta et al., 2008); This study                                   |
| WDC06A                  | -79.47 | -112.09 | 1806 | 0    | 2004 | (Sigl et al., 2015; Sigl et al., 2013); This study                 |
| <i>WHG (IC)</i>         | -72.90 | 169.08  | 400  | 1883 | 2006 | (Sinclair et al., 2014); This study                                |
| <i>WHG (ICPMS)</i>      | -72.90 | 169.08  | 400  | 1977 | 2004 | (Sinclair et al., 2014)                                            |
| WP                      | -75.25 | 163.17  | 50   | N/A  | N/A  | (Bertler et al., 2004)                                             |

**Table S2.** List of sites in the CLIVASH2k chemistry database which have been identified as having a statistically significant correlation with sea ice concentration (SIC), winds (v850 and u850) or geopotential height (z500). Sites with a clear connection as determined by a panel of experts are marked with a Y. Sites where the mechanism was not clear are marked as uncertain (?). Sites where no correlation was observed are not shown.

| Site          | [Na <sup>+</sup> ] |      |      | Na <sup>+</sup> Flux |      |      | [SO <sub>4</sub> <sup>2-</sup> ] |      |      | SO <sub>4</sub> <sup>2-</sup> Flux |      |      | xs [SO <sub>4</sub> <sup>2-</sup> ] |      |      | xs SO <sub>4</sub> <sup>2-</sup> Flux |      |      |
|---------------|--------------------|------|------|----------------------|------|------|----------------------------------|------|------|------------------------------------|------|------|-------------------------------------|------|------|---------------------------------------|------|------|
|               | SIC                | Wind | z500 | SIC                  | Wind | z500 | SIC                              | Wind | z500 | SIC                                | Wind | z500 | SIC                                 | Wind | z500 | SIC                                   | Wind | z500 |
| B40           | Y                  |      |      | Y                    |      |      | Y                                |      |      | Y                                  |      |      | Y                                   |      |      | Y                                     |      |      |
| Bouvet Island | Y                  | Y    | Y    | Y                    | Y    | Y    |                                  | Y    | Y    | Y                                  | Y    | Y    | Y                                   |      |      | Y                                     | Y    | Y    |

|                     |   |   |   |   |   |   |   |   |   |   |   |   |   |   |   |   |   |   |
|---------------------|---|---|---|---|---|---|---|---|---|---|---|---|---|---|---|---|---|---|
| Bruce Plateau       | Y | Y | Y | Y | Y | Y |   |   |   | Y | Y | Y | Y | Y | Y | Y | Y | Y |
| cDML                | Y | Y | Y | Y | Y | Y | Y |   |   |   |   |   | Y |   |   |   |   |   |
| CWA_a_2013          | ? | ? | Y |   | Y |   | Y | Y | Y | ? | Y | Y | Y | Y | Y | Y | Y | Y |
| CWA_d_2013          | Y | Y | Y | Y | Y | Y | Y | Y | Y | Y | Y | Y | Y | Y | Y | Y | Y | Y |
| DFS10               |   |   |   |   |   |   | Y |   |   |   |   |   | Y |   |   |   |   |   |
| DIR                 | Y | Y | Y | Y | Y | Y | Y | Y | Y | Y | Y |   | Y | Y | Y | Y | Y |   |
| DIV2010             | Y | Y | Y | Y | Y | Y |   |   |   | Y | Y | ? | Y |   |   | Y |   |   |
| DML03C98_09(FB9809) | ? | Y | Y | Y | Y | Y |   |   |   |   |   |   |   |   |   |   |   |   |
| DML05               | Y | Y | Y | Y | Y | Y |   | Y |   |   | Y | Y | Y | Y | Y | Y | Y | Y |
| DML07               | Y | Y | Y | Y | Y | Y | Y | Y | Y | Y | Y | Y | Y | Y | Y | Y | Y | Y |
| DML15C98_14(FB9814) | Y |   | Y | Y | Y | Y |   |   |   |   |   |   |   |   |   |   |   |   |
| DML17C98_33(B33)    | Y | Y |   | Y |   | Y |   |   |   |   |   |   |   |   |   |   |   |   |
| DSS0506             |   | Y |   | Y | Y | Y |   |   |   |   |   |   |   |   |   |   |   |   |
| DT401               | Y | Y | Y |   |   |   | ? | ? | ? |   |   |   | ? | ? | ? |   |   |   |
| Ferrigno            | Y | Y | Y | Y | Y | Y | Y | Y |   | Y | Y | Y | Y | Y |   | Y | Y | Y |
| FIS_BI              | Y |   |   |   |   |   | Y | Y | Y |   |   |   | Y | Y | Y |   |   |   |
| FIS_KC              | Y |   |   |   |   |   | Y | ? | ? |   |   |   | Y |   |   |   |   |   |
| FIS_KM              | Y | Y | Y |   |   |   | Y | Y |   |   |   |   | Y | Y |   |   |   |   |
| FIS_S100            | Y |   | Y | Y |   | Y | Y |   | Y | Y |   |   | Y |   |   | Y | Y | Y |
| Gomez               |   | Y |   | Y | Y | Y | Y | Y | Y | Y | Y | Y | Y | Y | Y | Y |   |   |
| IC-06               | Y | Y | Y | Y |   |   | Y | ? |   |   |   |   | Y |   |   | ? | ? |   |
| ITASE-00-1          | Y |   |   | Y | Y | Y | Y | Y | Y | Y | Y | Y | Y | Y | Y | Y | Y | Y |
| ITASE-00-2          |   | Y |   | Y |   |   | Y | Y | Y | Y | Y |   | Y | Y | Y | Y | Y |   |
| ITASE-00-3          |   | Y |   | Y |   | Y | Y |   |   | Y | Y | Y | Y | Y |   |   |   |   |
| ITASE-00-4          | Y | Y |   | Y | Y | Y | Y | Y | Y | Y |   |   | Y | Y | Y | Y | Y |   |
| ITASE-00-5          | Y | Y | Y | Y | Y | Y | Y | Y |   | Y | Y | Y | Y | Y |   | Y | Y | Y |
| ITASE-01-1          | Y | Y |   | Y | Y |   | Y | Y | Y | Y | Y |   | Y |   | Y | Y | Y |   |
| ITASE-01-2          | Y | Y | Y | Y | Y | Y | Y | Y | Y | Y |   |   | Y | Y | Y | Y | Y |   |
| ITASE-01-3          | Y | Y | Y | Y | Y | Y | Y | Y | Y | Y | Y |   | Y | Y | Y | Y | Y |   |
| ITASE-01-4          | Y | Y | Y | Y | Y | Y | ? | ? | ? |   |   |   | Y | Y | Y |   |   |   |
| ITASE-01-5          | Y | Y | Y | Y |   |   | Y | Y | Y | Y | Y |   | Y | Y | Y | Y | Y |   |
| ITASE-01-6          | Y | Y |   | Y | Y |   | Y | Y | Y |   |   |   | Y | Y |   |   |   |   |
| ITASE-02-1          | Y | Y | Y | Y | Y | Y | Y | Y | Y | Y | Y | Y | Y | Y | Y | Y | Y |   |
| ITASE-02-4          | Y | Y | Y | Y | Y | Y | Y | Y | Y | Y | Y | Y | Y | Y |   | Y | Y | Y |

|                    |   |   |   |   |   |   |   |   |   |   |   |   |   |   |   |   |   |   |
|--------------------|---|---|---|---|---|---|---|---|---|---|---|---|---|---|---|---|---|---|
| ITASE-02-5         |   |   |   |   |   |   | Y | Y | Y |   |   |   |   |   |   |   |   |   |
| ITASE-02-6         | Y | Y | Y | Y | Y | Y | Y | Y | Y | Y | Y | Y | Y | Y | Y | Y | Y | Y |
| ITASE-02-7         | Y | Y | Y | Y | Y | Y | Y | Y |   | ? | ? |   | Y | Y |   | Y |   |   |
| ITASE-03-1         | Y | Y | Y |   |   |   | Y | Y |   |   |   |   | Y | Y |   |   |   |   |
| Jurassic           | Y | Y | Y | Y | Y | Y | Y | Y | Y | Y | Y | Y | Y | Y | Y |   |   |   |
| LawDome_DSS        |   |   |   | Y | Y | Y |   | Y | Y | Y | Y | Y | Y | Y | Y |   | Y | Y |
| LGB69              | Y |   |   |   |   |   | Y | Y |   |   |   |   | Y | Y |   |   |   |   |
| MES2012 (IC)       | Y | Y |   |   |   |   | Y | Y |   |   |   |   | Y | Y |   |   |   |   |
| MES2012 (ICPMS)    |   | Y | Y |   |   |   |   |   |   |   |   |   |   |   |   |   |   |   |
| MI0910             | Y |   |   |   |   |   | Y |   |   |   |   |   | Y |   |   |   |   |   |
| Mount Johns        | Y | Y |   | Y | ? |   | Y |   |   | Y | Y | Y | Y |   |   | Y | Y | Y |
| NFL-1              | Y | Y |   |   |   |   | Y | Y |   |   |   |   | Y | Y | ? |   |   |   |
| NUS07-1            | Y | Y |   | Y | Y |   | Y |   |   | Y |   |   | Y | Y | Y | Y | Y | Y |
| NUS07-2            | Y | Y |   | Y | Y |   |   | Y |   |   |   |   |   | Y |   |   | Y |   |
| NUS07-7            | Y | Y | Y | Y | Y | Y |   | Y | Y | ? | Y | Y | Y | Y | Y | Y | Y | Y |
| NUS08-4            | Y | Y |   | Y | Y |   |   |   |   |   |   |   | ? | ? | ? |   | ? |   |
| NUS08-5            | Y | Y |   | Y | Y |   | Y | Y |   |   | Y |   | ? | Y | ? | Y | Y |   |
| NUS08-7            | Y | Y | Y | Y | Y | Y | Y | Y | Y | Y | Y | Y | Y | Y | Y | Y | Y | Y |
| NVFL00             | ? | ? | ? |   |   |   | Y | Y | Y |   |   |   | Y | Y | Y |   |   |   |
| NVFL-1             | Y | Y | Y |   |   |   | Y | Y | Y |   |   |   | Y | Y | Y |   |   |   |
| Palmer             | Y | Y | Y | Y | Y | Y | Y | ? | Y | Y | Y |   | ? |   | Y | Y | Y |   |
| PIG2010            | Y | Y | Y | Y | Y | Y | Y | Y | Y | Y | Y |   | Y | Y | Y | Y | Y |   |
| PIG                | Y | Y | Y | Y | Y | Y |   |   |   |   |   |   |   |   |   |   |   |   |
| PV-10              | Y |   |   |   |   |   |   | Y |   |   |   |   |   | Y |   |   |   |   |
| Rendezvous         | Y | Y | Y | Y | Y | Y | ? |   |   | Y | Y |   | Y | Y | Y |   |   |   |
| RIDS95A_2013       | Y | Y | Y | Y | Y | Y | Y | Y | Y | Y | Y | Y | Y | Y | Y | Y | Y | Y |
| RIDS95B_2013       | Y | Y | Y | Y | Y | Y | Y | Y | Y | Y | Y | Y | Y | Y | Y | Y | Y | Y |
| RIDS95C_2013       | Y | Y | Y | Y | Y | Y |   |   |   |   | ? |   |   |   |   |   | Y |   |
| SCH2               | Y | Y | Y |   | Y |   | Y |   |   | Y |   |   | Y |   |   | Y |   |   |
| SDM1994_2013       |   | Y |   | Y | Y | Y | Y | Y |   | Y | Y | Y | Y | Y |   | Y | Y | Y |
| SHIC               | Y |   |   | ? |   |   | Y |   |   |   |   |   | Y |   |   |   |   |   |
| SKBL               | Y |   |   | Y |   | Y | Y | Y | Y | Y | Y | Y | Y |   |   | Y | Y | Y |
| SouthPole1995_2013 | ? | Y |   | Y | Y | Y | ? | Y | ? | ? | Y | ? | Y | Y | Y |   | Y | ? |



|                     |   |   |   |   |   |   |   |   |   |   |   |   |   |   |   |   |   |   |
|---------------------|---|---|---|---|---|---|---|---|---|---|---|---|---|---|---|---|---|---|
| SP01                | Y | Y |   | Y | Y | Y | Y | ? | ? | Y | Y |   | Y | Y | Y | Y | Y | ? |
| SP04C5              | Y | Y | Y | ? | ? | ? |   | Y |   |   | ? | ? | Y | Y | Y | Y |   |   |
| SP04C6              | Y |   |   | ? | ? | ? | ? | Y |   | ? | Y |   | Y | Y |   | Y | Y |   |
| SPICE               | Y | Y | Y | ? | ? | ? |   |   |   |   |   |   | ? | ? | ? | ? | ? | ? |
| SW-80               | Y |   |   |   |   |   |   |   |   |   |   |   | Y |   |   |   |   |   |
| TA192A__Adelie_Land | ? | ? | ? |   |   |   | Y | Y | Y |   |   |   | Y | Y | Y |   |   |   |
| TD96                |   |   |   |   |   |   | Y | Y | Y | Y | Y | Y |   |   |   |   |   |   |
| THW2010             | Y | Y | Y | Y | Y | Y | Y | Y |   | Y |   |   | Y | Y | Y | Y | Y |   |
| THW                 | Y | Y | Y | Y | Y | Y |   |   |   |   |   |   |   |   |   |   |   |   |
| UpC_2013            |   |   |   | Y | Y |   | Y | Y | Y | Y | Y | Y | Y | Y | Y | Y | Y | Y |
| vk55                | Y | Y |   |   |   |   | ? | ? | ? |   |   |   | Y | Y | Y |   |   |   |
| VLG                 | Y | Y | Y |   |   |   | Y | Y | Y |   |   |   | Y | Y | Y |   |   |   |
| W10k                | ? |   | Y |   |   |   | Y | Y | Y |   |   |   | Y |   | ? |   |   |   |
| WDC05Q              | Y | Y | Y |   |   |   | Y | Y |   |   |   |   | Y | Y |   |   |   |   |
| WDC06A              | Y | Y | Y | Y |   |   | Y | Y | Y | Y | Y | Y | Y | Y | Y | Y | Y | Y |
| WHG (IC)            |   |   |   |   |   |   | Y | ? |   |   |   |   |   | Y |   |   |   |   |
| WHG (ICPMS)         | Y |   |   |   |   |   |   |   |   |   |   |   |   |   |   |   |   |   |
| H15                 | Y | Y |   |   |   |   | Y | Y | Y |   |   |   | Y | Y | Y |   |   |   |

## References:

- Baggenstos, D., Severinghaus, J. P., Mulvaney, R., McConnell, J. R., Sigl, M., Maselli, O., Petit, J.-R., Grente, B., and Steig, E. J.: A Horizontal Ice Core From Taylor Glacier, Its Implications for Antarctic Climate History, and an Improved Taylor Dome Ice Core Time Scale, *Paleoceanography and Paleoclimatology*, 33, 778-794, <https://doi.org/10.1029/2017PA003297>, 2018.
- Banta, J. R., McConnell, J. R., Frey, M. M., Bales, R. C., and Taylor, K.: Spatial and temporal variability in snow accumulation at the West Antarctic Ice Sheet Divide over recent centuries, *Journal of Geophysical Research: Atmospheres*, 113, <https://doi.org/10.1029/2008JD010235>, 2008.
- Bertler, N., Mayewski, P. A., Arístarain, A., Barrett, P., Becagli, S., Bernardo, R., Bo, S., C, X., Curran, M., D, Q., Dixon, D., Ferrona, F., Fischer, H., Frey, M., Frezzotti, M., Fundel, F., Genthon, C., Gragnani, R., Hamilton, G., Handley, M., Hong, S., Isaksson, E., J, K., J, R., Kamiyama, K., Kanamori, S., Kärkäs, E., Karlöf, L., Kaspari, S., Kreutz, K., Meyerson, E., Kurbatov, A., Ming, Y., M, Z., Motoyama, H., Mulvaney, R., Oerter, H., Osterberg, E., Proposito, M., Pyne, A., Ruth, U.,

- Simões, J., Smith, B., Sneed, S., Teinilä, K., Traufetter, F., Udisti, R., Virkkula, A., Watanabe, O., Williamson, B., Winther, J. G., Y, L., Wolff, E., Z, L., and Zielinski, A.: Snow chemistry across Antarctica, *Annals of Glaciology*, 41, 167-179, 10.3189/172756405781813320, 2005.
- Bertler, N. A., Mayewski, P. A., and Carter, L.: Volcanic peak chronology of ice core VLG\_DSS, PANGAEA [dataset], 10.1594/PANGAEA.866365, 2011.
- Bertler, N. A. N., Barrett, P. J., Mayewski, P. A., Fogt, R. L., Kreutz, K. J., and Shulmeister, J.: El Niño suppresses Antarctic warming, *Geophysical Research Letters*, 31, <https://doi.org/10.1029/2004GL020749>, 2004.
- Budner, D. and Cole-Dai, J.: The Number and Magnitude of Large Explosive Volcanic Eruptions Between 904 and 1865 A.D.: Quantitative Evidence from a New South Pole Ice Core, in: *Volcanism and the Earth's Atmosphere*, 165-176, <https://doi.org/10.1029/139GM10>, 2004.
- Castellano, E., Becagli, S., Hansson, M., Hutterli, M., Petit, J. R., Rampino, M. R., Severi, M., Steffensen, J. P., Traversi, R., and Udisti, R.: Holocene volcanic history as recorded in the sulfate stratigraphy of the European Project for Ice Coring in Antarctica Dome C (EDC96) ice core, *Journal of Geophysical Research: Atmospheres*, 110, <https://doi.org/10.1029/2004JD005259>, 2005.
- Crisciello, A. S., Das, S. B., Evans, M. J., Frey, K. E., Conway, H., Joughin, I., Medley, B., and Steig, E. J.: Ice sheet record of recent sea-ice behavior and polynya variability in the Amundsen Sea, West Antarctica, *Journal of Geophysical Research: Oceans*, 118, 118-130, 10.1029/2012jc008077, 2013.
- Dixon, D. A., Mayewski, P. A., Goodwin, I. D., Marshall, G. J., Freeman, R., Maasch, K. A., and Sneed, S. B.: An ice-core proxy for northerly air mass incursions into West Antarctica, *International Journal of Climatology*, 32, 1455-1465, <https://doi.org/10.1002/joc.2371>, 2012.
- Emanuelsson, B. D., Thomas, E. R., Tetzner, D. R., Humby, J. D., and Vladimirova, D. O.: Ice Core Chronologies from the Antarctic Peninsula: The Palmer, Jurassic, and Rendezvous Age-Scales, *Geosciences*, 12, 87, 2022.
- Ferris, D. G., Cole-Dai, J., Reyes, A. R., and Budner, D. M.: South Pole ice core record of explosive volcanic eruptions in the first and second millennia A.D. and evidence of a large eruption in the tropics around 535 A.D, *Journal of Geophysical Research: Atmospheres*, 116, <https://doi.org/10.1029/2011JD015916>, 2011.
- Fischer, H., Fundel, F., Ruth, U., Twarloh, B., Wegner, A., Udisti, R., Becagli, S., Castellano, E., Morganti, A., Severi, M., Wolff, E. W., Littot, G. C., Röthlisberger, R., Mulvaney, R., Hutterli, M. A., Kaufmann, P. R., Federer, U., Lambert, F., Bigler, C., Hansson, M. E., Jonsell, U., de Angelis, M., Boutron, C. F., Siggaard-Andersen, M.-L., Steffensen, J. P., Barbante, C., Gaspari, V., Gabrielli, P., and Wagenbach, D.: Chemical concentrations and fluxes from EPICA ice cores EDML and EDC, 10.1594/PANGAEA.787775, 2007.
- Fujita, S., Parrenin, F., Severi, M., Motoyama, H., and Wolff, E. W.: Volcanic synchronization of Dome Fuji and Dome C Antarctic deep ice cores over the past 216 kyr, *Clim. Past*, 11, 1395-1416, 10.5194/cp-11-1395-2015, 2015.
- Goursaud, S., Masson-Delmotte, V., Favier, V., Preunkert, S., Legrand, M., Minster, B., and Werner, M.: Challenges associated with the climatic interpretation of water stable isotope records from a highly resolved firn core from Adélie Land, coastal Antarctica, *The Cryosphere*, 13, 1297-1324, 10.5194/tc-13-1297-2019, 2019.
- Hoffmann, K., Fernandoy, F., Meyer, H., Thomas, E. R., Aliaga, M., Tetzner, D., Freitag, J., Opel, T., Arigony-Neto, J., Göbel, C. F., Jaña, R., Rodríguez Oroz, D., Tuckwell, R., Ludlow, E., McConnell, J. R., and Schneider, C.: Stable water isotopes and accumulation rates in the Union Glacier region, Ellsworth Mountains, West Antarctica, over the last 35 years, *The Cryosphere*, 14, 881-904, 10.5194/tc-14-881-2020, 2020.
- Inoue, M., Curran, M. A. J., Moy, A. D., van Ommen, T. D., Fraser, A. D., Phillips, H. E., and Goodwin, I. D.: A glaciochemical study of the 120 m ice core from Mill Island, East Antarctica, *Clim. Past*, 13, 437-453, 10.5194/cp-13-437-2017, 2017.
- Jong, L. M., Plummer, C. T., Roberts, J. L., Moy, A. D., Curran, M. A. J., Vance, T. R., Pedro, J., Long, C., Nation, M., Mayewski, P. A., and van Ommen, T. D.: 2000 years of annual ice core data from Law Dome, East Antarctica, *Earth Syst. Sci. Data Discuss.*, 2022, 1-26, 10.5194/essd-2021-408, 2022.
- Khodzher, T. V., Golobokova, L. P., Maslenikova, M. M., Osipov, E. Y., and Ekaykin, A. A.: Chemistry of snow and ice cores along the ice flow lines at Lake Vostok (Antarctica), *Geochemistry*, 80, 125595, <https://doi.org/10.1016/j.chemer.2019.125595>, 2020.
- King, A. C. F., Thomas, E. R., Pedro, J. B., Markle, B., Potocki, M., Jackson, S. L., Wolff, E., and Kalberer, M.: Organic Compounds in a Sub-Antarctic Ice Core: A Potential Suite of Sea Ice Markers, *Geophysical Research Letters*, 46, 9930-9939, 10.1029/2019gl084249, 2019.
- Kohn, M. and Fujii, Y.: Past 220 year bipolar volcanic signals: remarks on common features of their source volcanic eruptions, *Annals of Glaciology*, 35, 217-223, 2002.

- KOHNO, M., FUJII, Y., KUSAKABE, M., and FUKUOKA, T.: The last 300-year volcanic signals recorded in an ice core from site H15, Antarctica, *Journal of the Japanese Society of Snow and Ice*, 61, 13-24, 1999.
- Kohno, M., Fukuoka, T., Fujii, Y., and KusAKABE, M.: Volcanic records and dating of the upper half of the H15 ice core from Mizuho Plateau, East Antarctica, 1995.
- Kreutz, K. J., Mayewski, P. A., Meeker, L. D., Twickler, M. S., and Whitlow, S. I.: The effect of spatial and temporal accumulation rate variability in west Antarctica on soluble ion deposition, *Geophysical Research Letters*, 27, 2517-2520, <https://doi.org/10.1029/2000GL011499>, 2000.
- Kreutz, K. J., Mayewski, P. A., Meeker, L. D., Twickler, M. S., Whitlow, S. I., and Pittalwala, I. I.: Bipolar Changes in Atmospheric Circulation During the Little Ice Age, *Science*, 277, 1294-1296, doi:10.1126/science.277.5330.1294, 1997.
- Li, C., Ren, J., Xiao, C., Hou, S., Ding, M., and Qin, D.: A 2680-year record of sea ice extent in the Ross Sea and the associated atmospheric circulation derived from the DT401 East Antarctic ice core, *Science China Earth Sciences*, 58, 2090-2102, 10.1007/s11430-015-5125-3, 2015.
- Li, R., Xiao, C., Sneed, S., and Yan, M.: A continuous 293-year record of volcanic events in an ice core from Lambert Glacier basin, East Antarctica, *Antarctic Science*, 24, 293-298, 2012.
- Markle, B. R., Bertler, N. A. N., Sinclair, K. E., and Sneed, S. B.: Synoptic variability in the Ross Sea region, Antarctica, as seen from back-trajectory modeling and ice core analysis, *Journal of Geophysical Research: Atmospheres*, 117, <https://doi.org/10.1029/2011JD016437>, 2012.
- Mayewski, P. A. and Dixon, D. A.: US International Trans-Antarctic Scientific Expedition (US ITASE) Glaciochemical Data. Version 1. [dataset], <http://dx.doi.org/10.7265/N5BR8Q4W>, 2005.
- Mayewski, P. A., Twickler, M. S., Whitlow, S. I., Meeker, L. D., Yang, Q., Thomas, J., Kreutz, K., Grootes, P. M., Morse, D. L., Steig, E. J., Waddington, E. D., Saltzman, E. S., Whung, P. Y., and Taylor, K. C.: Climate Change During the Last Deglaciation in Antarctica, *Science*, 272, 1636-1638, 1996.
- Meyerson, E. A., Mayewski, P. A., Kreutz, K. J., David Meeker, L., Whitlow, S. I., and Twickler, M. S.: The polar expression of ENSO and sea-ice variability as recorded in a South Pole ice core, *Annals of Glaciology*, 35, 430-436, 10.3189/172756402781817149, 2002.
- Motizuki, Y., Motoyama, H., Nakai, Y., Suzuki, K., Iizuka, Y., and Takahashi, K.: Overview of the chemical composition and characteristics of Na<sup>+</sup> and Cl<sup>-</sup> distributions in shallow samples from Antarctic ice core DF01 (Dome Fuji) drilled in 2001, *GEOCHEMICAL JOURNAL*, 51, 293-298, 10.2343/geochemj.2.0458, 2017.
- Motizuki, Y., Nakai, Y., Takahashi, K., Igarashi, M., Motoyama, H., and Suzuki, K.: Dating of a Dome Fuji (Antarctica) shallow ice core by volcanic signal synchronization with B32 and EDML1 chronologies, *The Cryosphere Discussions*, 8, 769-804, 2014.
- Naik, S. S., Thamban, M., Laluraj, C., Redkar, B., and Chaturvedi, A.: A century of climate variability in central Dronning Maud Land, East Antarctica, and its relation to Southern Annular Mode and El Niño-Southern Oscillation, *Journal of Geophysical Research: Atmospheres*, 115, 2010.
- Osipov, E., Osipova, O., and Khodzher, T.: Recent variability of atmospheric circulation patterns inferred from East Antarctica glaciochemical records, *Geochemistry*, 80, 125554, 2020.
- Pasteris, D., McConnell, J. R., Edwards, R., Isaksson, E., and Albert, M. R.: Acidity decline in Antarctic ice cores during the Little Ice Age linked to changes in atmospheric nitrate and sea salt concentrations, *Journal of Geophysical Research: Atmospheres*, 119, 5640-5652, <https://doi.org/10.1002/2013JD020377>, 2014.
- Philippe, M., Tison, J. L., Fjøsne, K., Hubbard, B., Kjær, H. A., Lenaerts, J. T. M., Drews, R., Sheldon, S. G., De Bondt, K., Claeys, P., and Pattyn, F.: Ice core evidence for a 20th century increase in surface mass balance in coastal Dronning Maud Land, East Antarctica, *The Cryosphere*, 10, 2501-2516, 10.5194/tc-10-2501-2016, 2016.
- Rahaman, W., Thamban, M., and Laluraj, C.: Twentieth-century sea ice variability in the Weddell Sea and its effect on moisture transport: Evidence from a coastal East Antarctic ice core record, *The Holocene*, 26, 338-349, 10.1177/0959683615609749, 2016.
- Ren, J., Li, C., Hou, S., Xiao, C., Qin, D., Li, Y., and Ding, M.: A 2680 year volcanic record from the DT-401 East Antarctic ice core, *Journal of Geophysical Research: Atmospheres*, 115, <https://doi.org/10.1029/2009JD012892>, 2010a.
- Ren, J., Li, C., Hou, S., Xiao, C., Qin, D., Li, Y., and Ding, M.: A 2680 year volcanic record from the DT-401 East Antarctic ice core, *Journal of Geophysical Research: Atmospheres*, 115, 2010b.

- Reusch, D. B., Mayewski, P. A., Whitlow, S. I., Pittalwala, I. I., and Twickler, M. S.: Spatial variability of climate and past atmospheric circulation patterns from central West Antarctic glaciochemistry, *Journal of Geophysical Research: Atmospheres*, 104, 5985–6001, <https://doi.org/10.1029/1998JD200056>, 1999.
- Rhodes, R. H., Bertler, N. A. N., Baker, J. A., Steen-Larsen, H. C., Sneed, S. B., Morgenstern, U., and Johnsen, S. J.: Little Ice Age climate and oceanic conditions of the Ross Sea, Antarctica from a coastal ice core record, *Clim. Past*, 8, 1223–1238, 10.5194/cp-8-1223-2012, 2012.
- Röthlisberger, R., Mulvaney, R., Wolff, E. W., Hutterli, M. A., Bigler, M., Sommer, S., and Jouzel, J.: Dust and sea salt variability in central East Antarctica (Dome C) over the last 45 kyr and its implications for southern high-latitude climate, *Geophysical Research Letters*, 29, 24-21-24-24, <https://doi.org/10.1029/2002GL015186>, 2002.
- Ruth, U., Wagenbach, D., Mulvaney, R., Oerter, H., Graf, W., Pulz, H., and Littot, G.: Comprehensive 1000 year climatic history from an intermediate-depth ice core from the south dome of Berkner Island, Antarctica: methods, dating and first results, *Annals of Glaciology*, 39, 146–154, 10.3189/172756404781814104, 2004.
- Schwanck, F., Simões, J. C., Handley, M., Mayewski, P. A., Auger, J. D., Bernardo, R. T., and Aquino, F. E.: A 125-year record of climate and chemistry variability at the Pine Island Glacier ice divide, Antarctica, *The Cryosphere*, 11, 1537–1552, 10.5194/tc-11-1537-2017, 2017.
- Severi, M., Udisti, R., Becagli, S., Stenni, B., and Traversi, R.: Volcanic synchronisation of the EPICA-DC and TALDICE ice cores for the last 42 kyr BP, *Clim. Past*, 8, 509–517, 10.5194/cp-8-509-2012, 2012.
- Severi, M., Becagli, S., Caiazza, L., Ciardini, V., Colizza, E., Giardi, F., Mezgec, K., Scarchilli, C., Stenni, B., Thomas, E. R., Traversi, R., and Udisti, R.: Sea salt sodium record from Talos Dome (East Antarctica) as a potential proxy of the Antarctic past sea ice extent, *Chemosphere*, 177, 266–274, <https://doi.org/10.1016/j.chemosphere.2017.03.025>, 2017.
- Sigl, M., McConnell, J. R., Layman, L., Maselli, O., McGwire, K., Pasteris, D., Dahl-Jensen, D., Steffensen, J. P., Vinther, B., Edwards, R., Mulvaney, R., and Kipfstuhl, S.: A new bipolar ice core record of volcanism from WAIS Divide and NEEM and implications for climate forcing of the last 2000 years, *Journal of Geophysical Research: Atmospheres*, 118, 1151–1169, <https://doi.org/10.1029/2012JD018603>, 2013.
- Sigl, M., McConnell, J. R., Toohey, M., Curran, M., Das, S. B., Edwards, R., Isaksson, E., Kawamura, K., Kipfstuhl, S., Krüger, K., Layman, L., Maselli, O. J., Motizuki, Y., Motoyama, H., Pasteris, D. R., and Severi, M.: Insights from Antarctica on volcanic forcing during the Common Era, *Nature Climate Change*, 4, 693–697, 10.1038/nclimate2293, 2014.
- Sigl, M., Winstrup, M., McConnell, J. R., Welten, K. C., Plunkett, G., Ludlow, F., Büntgen, U., Caffee, M., Chellman, N., Dahl-Jensen, D., Fischer, H., Kipfstuhl, S., Kostick, C., Maselli, O. J., Mekhaldi, F., Mulvaney, R., Muscheler, R., Pasteris, D. R., Pilcher, J. R., Salzer, M., Schüpbach, S., Steffensen, J. P., Vinther, B. M., and Woodruff, T. E.: Timing and climate forcing of volcanic eruptions for the past 2,500 years, *Nature*, 523, 543–549, 10.1038/nature14565, 2015.
- Sinclair, K. E., Bertler, N. A. N., Bowen, M. M., and Arrigo, K. R.: Twentieth century sea-ice trends in the Ross Sea from a high-resolution, coastal ice-core record, *Geophysical Research Letters*, 41, 3510–3516, 10.1002/2014gl059821, 2014.
- Sommer, S., Wagenbach, D., Mulvaney, R., and Fischer, H.: Glacio-chemical study spanning the past 2 kyr on three ice cores from Dronning Maud Land, Antarctica: 2. Seasonally resolved chemical records, *Journal of Geophysical Research: Atmospheres*, 105, 29423–29433, <https://doi.org/10.1029/2000JD900450>, 2000.
- Stenni, B., Proposito, M., Gragnani, R., Flora, O., Jouzel, J., Falourd, S., and Frezzotti, M.: Eight centuries of volcanic signal and climate change at Talos Dome (East Antarctica), *Journal of Geophysical Research: Atmospheres*, 107, ACL 3-1–ACL 3-13, <https://doi.org/10.1029/2000JD000317>, 2002.
- Tetzner, D. R., Allen, C. S., and Thomas, E. R.: Regional variability of diatoms in ice cores from the Antarctic Peninsula and Ellsworth Land, Antarctica, *The Cryosphere*, 16, 779–798, 10.5194/tc-16-779-2022, 2022.
- Toen, I. U. S., Jefferson Cardia. Lindau.,Filipe Gaudie Ley Sneed, Sharon Buchanan. : Ionic content in an ice core from the West Antarctic Ice Sheet: 1882–2008 A.D., *Brazilian Journal of Geology. Sociedade Brasileira de Geologia*, 48, 853–865, 2018.
- Thomas, E. R. and Bracegirdle, T. J.: Improving ice core interpretation using in situ and reanalysis data, *Journal of Geophysical Research: Atmospheres*, 114, 10.1029/2009jd012263, 2009.
- Thomas, E. R. and Bracegirdle, T. J.: Precipitation pathways for five new ice core sites in Ellsworth Land, West Antarctica, *Climate dynamics*, 10.1007/s00382-014-2213-6, 2015.

- Thomas, E. R., Marshall, G. J., and McConnell, J. R.: A doubling in snow accumulation in the western Antarctic Peninsula since 1850, *Geophysical Research Letters*, 35, <https://doi.org/10.1029/2007GL032529>, 2008.
- Thomas, E. R., Bracegirdle, T. J., Turner, J., and Wolff, E. W.: A 308 year record of climate variability in West Antarctica, *Geophysical Research Letters*, 40, 5492-5496, <https://doi.org/10.1002/2013GL057782>, 2013.
- Thomas, E. R., Hosking, J. S., Tuckwell, R. R., Warren, R. A., and Ludlow, E. C.: Twentieth century increase in snowfall in coastal West Antarctica, *Geophysical Research Letters*, 42, 9387-9393, 10.1002/2015gl065750, 2015.
- Thomas, E. R., Gacitúa, G., Pedro, J. B., Faith King, A. C., Markle, B., Potocki, M., and Moser, D. E.: Physical properties of shallow ice cores from Antarctic and sub-Antarctic islands, *The Cryosphere*, 15, 1173-1186, 10.5194/tc-15-1173-2021, 2021.
- Traufetter, F., Oerter, H., Fischer, H., Weller, R., and Miller, H.: Spatio-temporal variability in volcanic sulphate deposition over the past 2 kyr in snow pits and firn cores from Amundsenisen, Antarctica, *Journal of Glaciology*, 50, 137-146, 10.3189/172756504781830222, 2004.
- Vallelonga, P. T., Maffezzoli, N., Moy, A. D., Curran, M. A. J., Vance, T. R., Edwards, R. L., Hughes, G., Barker, E., Spreen, G., Saiz-Lopez, A., Corella, J. P., Cuevas, C. A., and Spolaor, A.: Law Dome Br, Na, I (1927-2016) and sea ice (1973-2015), 10.1594/PANGAEA.868431, 2016.
- Vega, C. P., Isaksson, E., Schlosser, E., Divine, D., Martma, T., Mulvaney, R., Eichler, A., and Schwikowski-Gigar, M.: Variability of sea salts in ice and firn cores from Fimbul Ice Shelf, Dronning Maud Land, Antarctica, *The Cryosphere*, 12, 1681-1697, 10.5194/tc-12-1681-2018, 2018.
- Winski, D. A., Osterberg, E. C., Kreutz, K. J., Ferris, D. G., Cole-Dai, J., Thundercloud, Z., Huang, J., Alexander, B., Jaeglé, L., Kennedy, J. A., Larrick, C., Kahle, E. C., Steig, E. J., and Jones, T. R.: Seasonally Resolved Holocene Sea Ice Variability Inferred From South Pole Ice Core Chemistry, *Geophysical Research Letters*, 48, e2020GL091602, <https://doi.org/10.1029/2020GL091602>, 2021.
- Winton, V. H. and Edwards, R.: Trace metal and back carbon concentrations in the Aurora Basin North 13/14 snow pit, Ver. 4, [dataset], doi:10.26179/5efec17c04747, 2022.
- Winton, V. H. L., Bowie, A., Curran, M., and Moy, A.: Enhanced Deposition of Atmospheric Soluble Iron by Intrusions of Marine Air Masses to East Antarctica, *Journal of Geophysical Research: Atmospheres*, e2022JD036586, 2022.
- Winton, V. H. L., Ming, A., Caillon, N., Hauge, L., Jones, A. E., Savarino, J., Yang, X., and Frey, M. M.: Deposition, recycling, and archival of nitrate stable isotopes between the air-snow interface: comparison between Dronning Maud Land and Dome C, Antarctica, *Atmos. Chem. Phys.*, 20, 5861-5885, 10.5194/acp-20-5861-2020, 2020.
- Winton, V. H. L., Edwards, R., Bowie, A. R., Keywood, M., Williams, A. G., Chambers, S. D., Selleck, P. W., Desservettaz, M., Mallet, M. D., and Paton-Walsh, C.: Dry season aerosol iron solubility in tropical northern Australia, *Atmos. Chem. Phys.*, 16, 12829-12848, 10.5194/acp-16-12829-2016, 2016.
- Wolff, E. W., Fischer, H., Fundel, F., Ruth, U., Twarloh, B., Littot, G. C., Mulvaney, R., Rothlisberger, R., de Angelis, M., Boutron, C. F., Hansson, M., Jonsell, U., Hutterli, M. A., Lambert, F., Kaufmann, P., Stauffer, B., Stocker, T. F., Steffensen, J. P., Bigler, M., Siggaard-Andersen, M. L., Udisti, R., Becagli, S., Castellano, E., Severi, M., Wagenbach, D., Barbante, C., Gabrielli, P., and Gaspari, V.: Southern Ocean sea-ice extent, productivity and iron flux over the past eight glacial cycles, *Nature*, 440, 491-496, 2006.
- Wolff, E. W., Barbante, C., Becagli, S., Bigler, M., Boutron, C. F., Castellano, E., de Angelis, M., Federer, U., Fischer, H., Fundel, F., Hansson, M., Hutterli, M., Jonsell, U., Karlin, T., Kaufmann, P., Lambert, F., Littot, G. C., Mulvaney, R., Röthlisberger, R., Ruth, U., Severi, M., Siggaard-Andersen, M. L., Sime, L. C., Steffensen, J. P., Stocker, T. F., Traversi, R., Twarloh, B., Udisti, R., Wagenbach, D., and Wegner, A.: Changes in environment over the last 800,000 years from chemical analysis of the EPICA Dome C ice core, *Quaternary Science Reviews*, 29, 285-295, <https://doi.org/10.1016/j.quascirev.2009.06.013>, 2010.
- Yang, J., Du, Z., and Xiao, C.: Sea Salt Sodium Record in a Shallow Ice Core from East Antarctica as a Potential Proxy of the Antarctic Sea Ice Extent in Southern Indian Ocean, *Journal of Ocean University of China*, 18, 1351-1359, 10.1007/s11802-019-4084-2, 2019.
